# Supplementary material for: Adding Dimensions to the Analysis of the Quality of Health Information of Websites Returned by Google: Cluster Analysis Identifies Patterns of Websites According to their Classification and the Type of Intervention Described
Source: Front Public Health. 2015 Aug 25;3:204. doi: 10.3389/fpubh.2015.00204 (PMC4548082; doi:10.3389/fpubh.2015.00204)
Supplement: Supplementary file 1 [file table_1.xlsx]

## Sheet: Sheet1
			Type of Intervention							Classification	JAMA Criteria
Position	Ranking	URL	Approved drug	Alternative medicine	Food	Procedures, devices,	Lifestyle, Triggers	Research drugs	no information given	Classification	Authorship	Attribution	Disclosure	Currency	total JAMA	WebCite Archived URL
1	1	http://www.wikihow.com/Treat-a-Migraine	1		1		1			PG	1	0	1	0	2	http://www.webcitation.org/6ZQGgqfFR
2	2	http://www.dailymail.co.uk/health/article-1275419/			1		1			J	1	0	1	1	3	http://www.webcitation.org/6ZSDcZCcq
3	3	http://www.rd.com/slideshows/10-proven-migraine-cures-plus-the-one-that-doesnt-work/	1	1	1	1	1			J	0	0	1	1	2	http://www.webcitation.org/6ZSDklWs2
4	4	http://healthyliving.msn.com/diseases/caregiving/7-natural-cures-for-migraines-1	1	1	1		1			HP	0	0	1	1	2	http://www.webcitation.org/6ZSDoLtnP
5	5	http://www.prevention.com/mind-body/natural-remedies/migraine-causes-and-cures	1	1	1	1	1			HP	1	0	1	1	3	http://www.webcitation.org/6ZSDqVChu
6	6	http://www.joybauer.com/migraine-headaches.aspx	1	1	1		1			HP	0	0	1	0	1	http://www.webcitation.org/6ZSDux1c5
7	7	http://www.nhs.uk/Conditions/Migraine/Pages/Treatment.aspx	1			1	1	1		P	0	0	1	1	2	http://www.webcitation.org/6ZSDyRU5G
8	8	http://www.webmd.com/migraines-headaches/guide/migraines-headaches-treatment-care	1		1	1	1			HP	0	1	1	0	2	http://www.webcitation.org/6ZSE1PemF
9	9	http://en.wikipedia.org/wiki/Migraine_treatment	1			1		1		NP	0	1	1	0	2	http://www.webcitation.org/6ZSE4WClw
10	10	http://health.howstuffworks.com/wellness/natural-medicine/home-remedies/home-remedies-for-migraine-pain-relief.htm		1	1					HP	1	0	1	0	2	http://www.webcitation.org/6ZSE7Sw4M
11	11	http://www.advancedmigraine.com/				1				C	0	0	1	0	1
12	12	http://www.medpagetoday.com/MeetingCoverage/IHC/40182				1				HP	1	0	1	1	3
13	13	http://www.migrainetrust.org/treatment	1			1	1			NP	0	0	1	0	1
14	14	http://www.mayoclinic.com/health/migraine-headache/DS00120/DSECTION=treatments-and-drugs	1	1	1	1	1			HP	0	0	1	1	2
15	15	http://www.newleafcenters.com/our-therapies/migraines-relief/				1				C	0	0	1	0	1
16	16	http://www.foxnews.com/story/2009/07/07/11-home-remedies-for-migraine-headaches	1	1	1		1			J	0	0	1	1	2
17	17	http://voices.yahoo.com/10-natural-migraine-cures-9547857.html		1	1		1			HP	1	0	1	1	3
18	18	http://www.bbc.co.uk/news/uk-england-cambridgeshire-23030025								J	0	0	1	1	2
19	19	http://www.nytimes.com/health/guides/disease/migraine/	1				1			J	0	1	1	1	3
20	20	http://www.amazon.com/The-Migraine-Cure-Forever-Migraines/dp/0938045709							1	C	1	0	1	1	3
21	21	http://www.huffingtonpost.com/2012/07/12/natural-migraine-relief_n_1666726.html	1	1	1	1	1			HP	1	0	1	1	3
22	22	http://www.pinterest.com/cheresamorgan/my-chronic-migraine-cures/			1					HP	0	0	1	0	1
23	23	http://www.lef.org/magazine/mag2006/dec2006_cover_migraine_01.htm	1					1		C	1	0	1	1	3
24	24	http://www.amazon.com/Mycratine-Migraine-Relief-Advanced-Formula/dp/B009YP9DMI		1						C	0	0	1	1	2
25	25	http://www.thedoctorstv.com/main/content/Migraines	1			1	1			HP	0	0	1	0	1
26	26	http://www.myhomeremedies.com/topic.cgi?topicid=134	1	1	1	1	1			PG	0	0	1	1	2
27	27	http://online.wsj.com/news/articles/SB10000872396390444320704577567352444742524	1					1		J	0	0	1	1	2
28	28	http://www.healthcentral.com/migraine/h/sporadic-hemiplegic-migraine-cure.html	1	1	1	1	1			HP	1	1	1	1	4
29	29	https://www.facebook.com/NaturalMigraineRelief							1	O	0	0	1	1	2
30	30	http://www.everydayhealth.com/pain-management/headache/sex-cure-or-trigger-for-migraine.aspx								HP	1	0	1	1	3
31	31	http://www.do-it-yourself-joint-pain-relief.com/natural-migraine-relief.html		1		1				HP	0	0	1	0	1
32	32	http://aca.ninemsn.com.au/video/?uuid=c015b3ac-a190-4b1d-9806-30cc6cfd462f							1	HP	0	0	1	1	2
33	33	http://www.lipigesic.com/	1							C	0	0	1	0	1
34	34	http://www.migracap.co.uk/				1				C	0	0	1	0	1
35	35	http://www.boston.com/lifestyle/health/2013/03/06/sex-may-cure-migraine-well-painkillers/7KQZkNp8408Djf2RhbGJMN/story.html					1			J	0	0	1	1	2
36	36	http://www.amazon.co.uk/4head-Headache-Migraine-Relief-Stick/dp/B000KU51SQ							1	C	0	0	1	1	2
37	37	http://migrainerelief.ca/		1	1	1	1			NP	0	0	1	0	1
38	38	http://migrainerelief.ca/migraine-relief/		1	1	1	1			NP	0	0	0	0	0
39	39	http://www.holistichelp.net/migraine-relief.html		1	1	1	1			HP	0	0	1	0	1
40	40	http://www.wfaa.com/news/health/surgery-offers-migraine-relief-nerve-decompression-cook-headaches-190065421.html	1			1				J	1	0	1	1	3
41	41	http://www.martinlass.com/migrainerelief.htm				1	1			C	1	0	1	0	2
42	42	http://www.philly.com/philly/health/Integrative_Medicine_Natural_remedies_for_migraine_relief.html		1	1					J	1	0	1	1	3
43	43	http://www.iloveindia.com/home-remedies/migraine.html		1	1	1	1			HP	0	0	1	0	1
44	44	http://www.dragondoor.com/b36/							1	C	0	0	1	0	1
45	45	http://curetogether.com/migraine/treatments/	1	1	1	1	1			PG	0	0	1	0	1
46	46	http://howtostayhealthy.hubpages.com/hub/What-Causes-A-Migraine-Headache-Drugs-And-Therapies-For-Migraine-Cure	1	1	1	1	1			HP	0	0	1	1	2
47	47	http://www.cnn.com/2009/HEALTH/08/04/migraine.surgery/	1			1				J	1	0	1	1	3
48	48	http://www.canadianliving.com/health/prevention/9_ways_to_get_rid_of_a_migraine.php	1	1	1	1	1			HP	1	0	1	0	2
49	49	http://www.healthline.com/health/migraine	1	1	1	1	1			HP	0	0	1	1	2
50	50	http://www.healthcommunities.com/migraine/naturalmedicine.shtml	1	1	1	1	1			HP	0	0	1	1	2
51	51	http://www.migraineresearchfoundation.org/migraine-stories.html		1		1	1			NP	0	0	1	0	1
52	52	http://www.quora.com/Laurence-Badgley/PAIN-SYNDROMES-CHRONIC/MIGRAINE-HEADACHES-CAUSE-and-CURE				1	1			HP	1	0	1	1	3
53	53	http://www.bupa.co.uk/individuals/health-information/directory/m/migraine	1	1		1	1			C	1	0	1	1	3
54	54	http://www.alternativemedicine.com/headaches/natural-remedies-migraine-relief		1	1	1	1			HP	1	0	1	0	2
55	55	http://www.menshealth.com/sex-women/breaking-news-sex-cures-migraines					1			J	1	0	1	1	3
56	56	http://metadrin.com/herbal-migraine-relief/		1	1	1	1			C	1	0	1	1	3
57	57	http://gulfnews.com/about-gulf-news/al-nisr-portfolio/tabloid-on-saturday/yoga-to-cure-migraine-calm-mind-1.1248128		1		1				HP	1	0	1	1	3
58	58	http://nowyoucanpinit.blogspot.com/2013/09/headache-or-migraine-relief.html		1		1				HP	1	0	1	1	3
59	59	http://www.walgreens.com/q/migraine-and-headache-relief							1	C	0	0	1	0	1
60	60	http://www.medicann.com/cannabis-and-pain-relief/migraine-headaches/		1	1	1				C	0	0	1	0	1
61	61	http://www.natural-juicing-remedies.com/migraine-headache-treatment.html		1	1	1				HP	0	0	1	0	1
62	62	http://humannhealth.com/foods-to-cure-migraine-headache/538/		1	1					HP	0	0	1	1	2
63	63	http://www.abc15.com/dpp/lifestyle/sonoran_living/sl_sponsors/medical-acupuncture-for-migraine-headaches	1	1		1	1			J	0	0	1	1	2
64	64	http://www.migracapusa.com/				1				C	0	0	1	0	1
65	65	http://frugallysustainable.com/2013/09/home-remedies-for-headaches-a-migraine-relief-herbal-tea-recipe/	1	1	1					HP	1	0	1	1	3
66	66	http://healthmeup.com/news-healthy-living/migraine-cure-home-remedies-to-treat-migraine/22039		1	1	1				HP	1	0	1	1	3
67	67	http://migrainefit.com/migraine/migraine-cure	1			1	1			HP	1	0	1	0	2
68	68	https://itunes.apple.com/ca/podcast/my-natural-migraine-cure/id336923970							1	C	1	0	1	0	2
69	69	http://www.livescience.com/27642-sex-relieves-migraine-pain.html					1			HP	1	0	1	1	3
70	70	http://www.thespec.com/living-story/4043246-natural-remedies-for-migraine-relief/		1	1			1		HP	1	0	1	1	3
71	71	http://www.azfamily.com/news/9pm-extra/Children-Find-Migraine-Relief-Through-Botox--202022101.html	1							HP	1	0	1	1	3
72	72	http://www.healthlibrary.com/book16_chapter459.htm		1	1	1	1			HP	1	0	1	0	2
73	73	http://www.drhomeo.com/migraine/top-five-homeopathic-medicines-to-cure-migraine-headaches/		1						HP	1	0	1	0	2
74	74	http://healthwyze.org/index.php/component/content/article/155-holistically-and-naturally-treating-migraine-headaches.html		1	1	1				HP	1	0	1	0	2
75	75	http://www.ebay.com/gds/Migraine-Headache-Cure-Too-Good-to-be-True-Headaches-/10000000003276526/g.html		1	1					C	0	0	1	0	1
76	76	http://www.swamiramdevmedicines.com/home-remedies/migraine.html		1	1	1				HP	0	0	1	0	1
77	77	http://www.choosenatural.com/migraines/migraine-relief/	1	1	1	1	1			HP	0	0	1	0	1
78	78	http://www.amoils.com/treatment/migraine/migraine-cure.html		1	1	1	1			C	0	0	1	0	1
79	79	http://www.drbatras.com/en/migraine/		1						HP	0	0	1	0	1
80	80	http://www.motherearthnews.com/natural-health/natural-headache-migraine-relief.aspx	1	1	1	1	1			HP	1	0	1	1	3
81	81	http://curezone.org/forums/am.asp?i=60104			1					PG	0	0	1	0	1
82	82	http://www.amazon.ca/The-Migraine-Cure-Forever-Migraines/dp/0938045709							1	C	1	0	1	1	3
83	83	http://www.themigrainereliefcenter.com/tips-for-treating-migraines		1		1	1			PG	0	0	1	0	1
84	84	http://www.popsci.com/science/article/2012-02/will-doctors-ever-cure-migraines				1				HP	1	0	1	1	3
85	85	http://www.swansonvitamins.com/ridgecrest-herbals-migraine-relief-60-caps		1						C	0	0	1	0	1
86	86	http://migraine.com/migraine-treatment/natural-remedies/	1	1	1	1	1			PG	0	0	1	0	1
87	87	http://www.lifescript.com/health/centers/migraine/articles/migraine_relief_learn_the_myths_and_facts.aspx	1		1		1			HP	1	0	1	1	3
88	88	http://altmedicine.about.com/cs/headachemigraine/a/Migraine.htm		1	1					HP	1	0	1	1	3
89	89	http://www.telegraph.co.uk/health/healthnews/9906594/Why-sex-is-a-better-headache-cure-rather-than-painkillers.html					1			J	1	0	1	1	3
90	90	http://www.dailyfinance.com/2013/04/28/does-this-common-vegetable-hold-the-migraine-cure/		1	1					HP	1	0	1	1	3
91	91	http://migrainecureclinic.com/		1		1				C	0	0	1	0	1
92	92	http://www.blenderbabes.com/lifestyle-diet/dairy-free/migraine-be-gone-green-juice/		1	1					HP	1	0	1	0	2
93	93	http://juicing-for-health.com/fun-free-recipes/juicing-by-health-conditions/headache-natural-remedy.html			1					HP	0	0	1	0	1
94	94	http://www.iherb.com/Source-Naturals-Migraine-Blocker-Headache-and-Migraine-Relief-48-Tablets/1289		1						C	0	0	1	0	1
95	95	http://americanpregnancy.org/pregnancyhealth/migraines.html	1	1		1	1			HP	0	0	1	1	2
96	96	http://healing.answers.com/remedies/top-herbal-teas-for-migraine-relief		1	1					HP	0	0	1	0	1
97	97	http://umm.edu/health/medical/reports/articles/migraine-headaches	1	1		1	1	1		P	0	1	1	1	3
98	98	http://www.homeremediesweb.com/migraine_home_remedy.php		1		1	1			HP	0	0	1	0	1
99	99	http://natural-migraine-relief.net/		1	1	1	1			HP	0	0	1	0	1
100	100	http://www.goodyspowder.com/products/caplets-migraine	1							C	0	0	1	0	1
101	101	http://www.hylands.com/products/hylands-migraine-headache-relief		1						C	0	0	1	0	1
102	102	http://www.migraine.ie/migraineandme/migraine-cures.html							1	NP	0	0	1	0	1
104	103	http://migrainetreatmentgroup.com/migraine-treatment/working-hard-for-a-migraine-cure		1						C	0	0	1	0	1
105	104	http://healthland.time.com/2012/04/25/botox-treatments-not-so-effective-for-migraine-headache-relief/	1							HP	1	0	1	1	3
106	105	http://www.washingtontimes.com/news/2013/mar/4/migraine-relief-sex-eases-headache-pain-well-medic/					1			J	1	0	1	1	3
107	106	http://www2.pulsetv.com/Migraine-Relief-Wrap-The-Natural-Headache-Cure/productinfo/5960/				1				C	0	0	1	0	1
108	107	http://www.disabled-world.com/artman/publish/cure-migraine.shtml		1		1				HP	0	0	1	1	2
109	108	http://homeopathyhelps.com/migraine.htm		1						C	0	0	1	0	1
110	109	http://www.gelstat.com/		1						C	0	0	1	0	1
111	110	http://www.poliquingroup.com/ArticlesMultimedia/Articles/Article/829/Five_Ways_You_Can_Treat_a_Migraine_Naturally.aspx		1			1			C	0	1	1	1	3
112	111	http://www.anniesremedy.com/chart_remedy_headache.php		1	1	1				HP	0	1	1	0	2
113	112	https://www.excedrin.com/headache-pain-relievers/migraine.shtml	1							C	0	0	1	0	1
114	113	http://mymiraclemigrainecure.yolasite.com/		1						C	0	0	1	0	1
115	114	http://www.themigrainesolution.com/		1		1				C	1	0	1	0	2
116	115	http://www.vitaminshoppe.com/p/hyland-migraine-headache-relief-60-tablets/sh-1130		1						C	0	0	1	0	1
117	116	http://www.scienceofpain.com/en/bayer-migraine-formula/	1							C	0	0	1	0	1
118	117	http://www.biosourcenaturals.com/essential-oil-headache-migraine-relief.htm		1		1				C	0	0	1	0	1
119	118	http://www.migralens.com/				1				C	0	0	1	0	1
120	119	http://midnightremedies.com/47-1-migraine.html	1	1	1	1	1			PG	0	0	1	1	2
121	120	http://www.fool.com/investing/general/2013/04/28/does-this-common-vegetable-hold-the-migraine-cure.aspx			1					HP	1	0	1	1	3
122	121	http://www.themigrainecure.net/		1		1	1			C	0	0	1	0	1
124	122	http://www.usefulhomeremedies.com/migraine.html		1	1					HP	0	0	1	0	1
125	123	http://tbo.com/health/natural-remedies-may-offer-migraine-relief-20130824/		1	1					HP	1	0	1	1	3
126	124	http://networkmagazine.ie/articles/hand-reflexology-headaches-and-migraine-relief-golden-egg-holistic		1						J	1	0	1	1	3
128	125	http://americanmigrainecenter.com/in-the-news/surgical-procedure-helps-cure-migraines/				1				C	0	0	1	0	1
129	126	https://twitter.com/SleepGuard		1	1	1	1			NP	0	0	1	1	2
130	127	http://www.desidieter.com/home-remedies/common-ailments/migraine.html		1	1		1			HP	0	0	1	0	1
131	128	http://0migraines.az.com/		1		1	1			C	0	0	1	0	1
132	129	http://www.drugstore.com/hylands-homeopathic-migraine-headache-relief/qxp85462		1						C	0	0	1	0	1
133	130	http://www.entofga.com/migraine-relief.php	1							C	0	0	1	0	1
134	131	http://www.academia.edu/940447/Migraine_Cure							1	P	1	0	1	0	2
135	132	http://www.newscientist.com/article/dn20150-can-botox-really-cure-chronic-migraine.html	1							P	1	0	1	1	3
136	133	http://migraine.com/topic/migraine-medication-relief/	1	1	1	1	1			PG	0	0	1	1	2
137	134	http://www.standard.co.uk/news/miracle-migraine-cure-6931201.html	1	1		1	1			J	1	0	1	1	3
138	135	http://www.care2.com/greenliving/sex-cure-migraines-cluster-headaches.html					1			HP	1	0	1	1	3
139	136	http://www.mynaturalfamily.com/doterra-essentials-oils/past-tense/natural-migraine-treatment-with-doterra-essential-oils/		1						C	1	0	1	0	2
140	137	http://www.homeveda.com/aches-and-pains/natural-ayurvedic-home-remedies-for-migraine.html		1	1	1				HP	0	0	1	0	1
141	138	http://headaches-and-migraines.yoexpert.com/headache-treatment-9171/what-are-the-five-most-effective-home-remedies-for-3509.html		1		1	1			HP	0	0	1	0	1
142	139	http://www.tylenol.ca/adult-pain-relief/tylenol-ultra-relief-migraine-pain	1							C	0	0	1	0	1
143	140	http://www.americanmigrainefoundation.org/about-migraine/	1			1	1			NP	0	0	1	0	1
144	141	https://earthclinic.com/CURES/migraines.html		1	1					HP	0	0	1	1	2
145	142	http://howtocuremigraine.com/treat-migraine-by-relieving-stress-through-meditation/							1	O	0	0	1	0	1
146	143	http://www.jiva.com/ayurveda/about-ayurveda/350.html		1	1	1	1			HP	0	0	1	0	1
147	144	http://anaturalmigrainerelief.wordpress.com/		1	1	1	1			HP	0	0	1	1	2
148	145	http://www.migrelief.com/migrelief-original		1	1					C	0	1	1	0	2
149	146	http://www.medulous.com/blog/strangest-migraine-relief-tips-youll-find-online/			1	1	1			HP	1	0	1	1	3
150	147	http://www.boldsky.com/health/disorders-cure/2013/foods-cure-migraine-headache-031913.html		1	1					HP	1	0	1	1	3
152	148	http://www.cosmeticsurgerycompare.com/pages/index.asp?title=Botox_a_Migraine_Cure	1							C	0	0	1	1	2
153	149	http://www.home-remedies-for-you.com/remedy/Migraine.html	1	1	1	1	1			HP	0	1	1	0	2
154	150	https://www.drfuhrman.com/disease/Headaches.aspx	1	1	1	1	1			HP	0	0	1	0	1
155	151	http://www.stormfront.org/forum/t977021/	1	1	1	1	1			PG	0	0	1	1	2
156	152	http://www.ninds.nih.gov/disorders/migraine/	1	1	1	1	1			P	0	0	1	1	2
157	153	http://www.newsmaxhealth.com/dr-oz/migraine-relief-sex-orgasm-headache-oz/2013/06/18/id/510466	1			1				HP	0	0	1	1	2
158	154	http://articles.timesofindia.indiatimes.com/2011-09-16/health/30160743_1_chronic-migraine-migraine-attack-k-ravishankar	1			1	1			J	1	0	1	1	3
159	155	http://www.walmart.com/ip/Equate-Migraine-Pain-Reliever-100ct/16554543	1							C	0	0	1	0	1
160	156	http://www.usatoday.com/story/news/nation/2012/10/09/migraines-headaches-pain-treatment/1623309/	1							HP	1	0	1	1	3
161	157	http://heritageessentialoils.com/migraine-relief.php		1	1					HP	0	0	1	0	1
162	158	http://www.cbsnews.com/news/sex-may-be-a-natural-way-to-treat-migraines-cluster-headaches/					1			J	1	0	1	1	3
163	159	https://groups.google.com/d/topic/alt.support.headaches.migraine/zT3Zcp9Y1E4	1		1					PG	0	0	1	1	2
164	160	http://homeopathyclinic.co.in/migraine-treatment-vitamin-b-and-folic-acid-can-offer-a-cure/		1	1					HP	1	0	1	0	2
165	161	http://www.feelgoodhomeopathy.com/blog/migraine-treatment-homeopathy		1			1			HP	0	0	1	0	1
166	162	http://www.drugs.com/uk/asda-migraine-relief-342mg-tablets-leaflet.html	1							HP	0	0	1	0	1
167	163	http://www.ksl.com/?sid=23812675				1				HP	1	0	1	1	3
168	164	http://www.angieslist.com/articles/seeking-relief-throbbing-migraine-headaches-you%E2%80%99re-not-alone.htm	1	1		1	1			HP	1	0	1	1	3
169	165	http://www.lanimuelrath.com/diet-nutrition/the-disappearing-migraine-what-you-need-to-know-to-cure-yourself-of-headaches/	1	1	1		1			HP	1	1	1	1	4
170	166	http://www.sharecare.com/health/migraine-headache-treatment/treat-migraine-headaches-occur-periods							1	PG	0	0	1	0	1
171	167	http://www.peoplespharmacy.com/2011/04/18/ice-cream-cure-for-migraine/			1					HP	0	0	1	1	2
172	168	http://anothermigraine.blogspot.com/2011/05/miracle-migraine-cure.html			1					HP	0	0	1	1	2
173	169	http://www.sciencedaily.com/releases/2010/10/101006114003.htm	1							HP	0	1	1	1	3
174	170	http://promyhealth.org/article.php?s=2011-11-11-a-migraine-cure			1		1			HP	1	0	1	1	3
175	171	http://www.seekingwithin.com/meditation-music/headache-relief-binaural-beats/				1				C	0	0	1	0	1
176	172	http://www.healthfitnessandsuccess.com/health-articles/migraine/migraine-treatment.html	1							HP	0	0	1	0	1
177	173	http://www.dallasnews.com/lifestyles/health-and-fitness/health/20130716-what-you-need-to-know-about-treatment-for-chronic-migraine.ece				1				J	1	0	1	1	3
178	174	http://chattanoogachiropracticcare.com/migraine-relief-chattanooga.html				1	1			C	0	0	1	0	1
179	175	http://www.chatelaine.com/health/wellness/five-natural-ways-to-manage-your-migraines-and-headaches/		1	1	1	1			HP	1	0	1	1	3
180	176	http://www.advil.com/symptoms-of-migraine	1				1			C	0	0	1	0	1
181	177	http://www.whittingtonchiropractic.com/chiropractic-benefits/migraine-headache/		1		1				C	0	1	1	0	2
182	178	http://articles.mercola.com/sites/articles/archive/2009/04/21/b-vitamins-offer-migraine-relief.aspx			1					C	0	0	1	1	2
183	179	http://www.migraine-dentistry.co.uk/testimonials.html					1			C	1	0	1	0	2
184	180	http://www.westcoastfamilychiropractic.com/Migraine-Headache-Relief-5-Approaches-That-May-Help.html		1		1	1			C	0	0	1	0	1
185	181	http://www.canadianliving.com/health/prevention/9_ways_to_get_rid_of_a_migraine.php	1	1	1	1	1			J	1	0	1	0	2
186	182	http://www.hypnoshop.com/hypnosis-cds-mp3s/migraine-relief.html		1		1				C	0	0	1	0	1
187	183	http://blog.neurokc.com/bid/84384/Migraine-Relief-Formula				1				HP	0	0	1	1	2
188	184	http://health.india.com/diseases-conditions/botox-the-incredible-migraine-cure/	1							J	0	0	1	1	2
189	185	http://www.drugfreemigrainecure.com/				1	1			C	0	0	1	0	1
190	186	http://www.drdavidwilliams.com/migraine-solutions/		1	1	1				C	0	0	1	1	2
191	187	http://www.rch.org.au/kidsinfo/fact_sheets/Migraine_headache/	1			1	1			P	0	0	1	1	2
192	188	http://www.homeoconsult.com/migraine_headache.php		1			1			C	0	0	1	0	1
193	189	http://www.beliefnet.com/Wellness/2009/07/Natural-Migraine-Relief.aspx		1		1				HP	1	0	1	0	2
194	190	http://health.sify.com/bananas-may-hold-hope-for-incurable-migraine-cure/			1					HP	0	0	1	0	1
195	191	http://www.nurturepod.com/yoga-spirituality/three-yoga-poses-for-migraine-relief/		1		1	1			C	0	0	1	1	2
196	192	http://www.topamax.com/about-migraines--treatment-options.html	1							C	0	0	1	1	2
197	193	http://reviews.costco.ca/2070-en_ca/10353011/stx-med-cefaly-anti-migraine-device-reviews/reviews.htm				1				C	0	0	1	0	1
198	194	http://www.rxlist.com/script/main/art.asp?articlekey=104593	1	1						HP	1	0	1	1	3
199	195	http://www.naturalnews.com/028866_butterbur_migraines.html		1						J	1	0	1	1	3
200	196	http://www.migraineshelp.com/top-10-migraine-relief-tools/	1	1	1	1				HP	0	0	1	1	2
