# Supplementary material for: Adding Dimensions to the Analysis of the Quality of Health Information of Websites Returned by Google: Cluster Analysis Identifies Patterns of Websites According to their Classification and the Type of Intervention Described
Source: Front Public Health. 2015 Aug 25;3:204. doi: 10.3389/fpubh.2015.00204 (PMC4548082; doi:10.3389/fpubh.2015.00204)
Supplement: Supplementary file 2 [file table_2.xlsx]

## Sheet: Sheet1
	Original URL	WebCite Archived URL
Position	Search terms "migraine cure"
1	http://www.everydayhealth.com/headache-migraine-pictures/8-home-remedies-for-headaches-and-migraines.aspx	http://www.webcitation.org/6ZSEXrCx0
2	http://www.mayoclinic.org/diseases-conditions/migraine-headache/in-depth/migraines/art-20047242	http://www.webcitation.org/6ZSEf3Z28
3	http://www.webmd.com/migraines-headaches/guide/migraines-headaches-treatment-care	http://www.webcitation.org/6ZSEhGmMD
4	http://www.nhs.uk/Conditions/Migraine/Pages/Treatment.aspx	http://www.webcitation.org/6ZSEjaS2n
5	http://www.prevention.com/mind-body/natural-remedies/migraine-causes-and-cures	http://www.webcitation.org/6ZSEllIwN
6	http://www.health.com/health/article/02084054600.html	n/a
7	http://www.health.com/health/gallery/02053829800.html	n/a
8	http://www.rd.com/slideshows/10-proven-migraine-cures-plus-the-one-that-doesnt-work/	http://www.webcitation.org/6ZSEt2Qoz
9	http://www.wikihow.com/Treat-a-Migraine	http://www.webcitation.org/6ZSEw8voh
10	https://www.caring.com/articles/7-natural-cures-for-migraines	http://www.webcitation.org/6ZSEyysmb
Position	Search terms "migraine therapy"
1	http://www.mayoclinic.org/diseases-conditions/migraine-headache/basics/treatment/con-20026358	http://www.webcitation.org/6ZSFNCYXd
2	http://emedicine.medscape.com/article/1142556-treatment	http://www.webcitation.org/6ZSFQQgIP
3	http://www.emedicinehealth.com/migraine_headache/page8_em.htm	http://www.webcitation.org/6ZSFSqfGO
4	http://www.webmd.com/migraines-headaches/features/prevention-future-of-migraine-therapy	http://www.webcitation.org/6ZSFXK1rD
5	http://www.rxlist.com/migraine_medications/drugs-condition.htm	http://www.webcitation.org/6ZSH3jbOt
6	http://www.americanheadachesociety.org/assets/1/7/NAP_for_Web_-_Acute_Treatment_of_Migraine.pdf	http://www.webcitation.org/6ZSH71Fg4
7	http://en.wikipedia.org/wiki/Migraine_treatment	http://www.webcitation.org/6ZSHCGun0
8	http://www.migrainetrust.org/preventative-treatments	http://www.webcitation.org/6ZSHDhfyo
9	http://www.migrainetrust.org/factsheet-botox-for-migraine-10899	http://www.webcitation.org/6ZSHFvTrA
10	http://www.achenet.org/resources/migraine_treatments/	http://www.webcitation.org/6ZSHHQvax
Position	Search terms "migraine treatment"
1	http://www.migrainetrust.org/treatment	http://www.webcitation.org/6ZSHK8K3J
2	http://www.nhs.uk/Conditions/Migraine/Pages/Treatment.aspx	http://www.webcitation.org/6ZSHNKpU2
3	http://www.rxlist.com/migraine_medications/drugs-condition.htm	http://www.webcitation.org/6ZSHQGYHv
4	http://www.mayoclinic.org/diseases-conditions/migraine-headache/basics/treatment/con-20026358	http://www.webcitation.org/6ZSHX7o2w
5	http://www.webmd.com/migraines-headaches/guide/migraines-headaches-treatment-care	http://www.webcitation.org/6ZSHZuyuk
6	http://www.health.com/health/gallery/02053829800.html	n/a
7	http://www.everydayhealth.com/headache-migraine-pictures/8-home-remedies-for-headaches-and-migraines.aspx	http://www.webcitation.org/6ZSHdKmjN
8	http://www.emedicinehealth.com/migraine_headache/page8_em.htm	http://www.webcitation.org/6ZSHjRd0A
9	http://www.patient.co.uk/health/migraine-leaflet	http://www.webcitation.org/6ZSHmTjT3
10	http://www.achenet.org/resources/migraine_treatments/	http://www.webcitation.org/6ZSHpAtSb
Position	Search terms "migraine medicine"
1	http://www.rxlist.com/migraine_medications/drugs-condition.htm	http://www.webcitation.org/6ZSHQGYHv
2	http://www.webmd.com/drugs/condition-1116-Migraine.aspx?diseaseid=1116&diseasename=Migraine	http://www.webcitation.org/6ZSLmnQhr
3	http://www.drugs.com/condition/migraine.html	http://www.webcitation.org/6ZSLrFbVA
4	http://www.migrainetrust.org/factsheet-medication-for-migraine-10509	http://www.webcitation.org/6ZSLtnhIn
5	http://www.patient.co.uk/health/medicines-to-treat-migraine-attacks	http://www.webcitation.org/6ZSLvdyKO
6	http://www.emedicinehealth.com/migraine_headache/page8_em.htm	http://www.webcitation.org/6ZSLykp2i
7	http://www.mayoclinic.org/diseases-conditions/migraine-headache/basics/treatment/con-20026358	http://www.webcitation.org/6ZSM2MjyU
8	http://www.medicinenet.com/migraine/focus.htm	http://www.webcitation.org/6ZSM5WQLk
9	http://www.nhs.uk/Conditions/Migraine/Pages/MedicineGuidePage.aspx	http://www.webcitation.org/6ZSMAVJIY
10	http://www.nhs.uk/Conditions/Migraine/Pages/Treatment.aspx	http://www.webcitation.org/6ZSHNKpU2

## Sheet: Sheet2
migraine cure	migraine therapy	migraine treatment	migraine medicine
everydayhealth.com	mayoclinic.org	migrainetrust.org	rxlist.com
mayoclinic.org	emedicine.medscape.com	nhs.uk	webmd.com
webmd.com	emedicinehealth.com	rxlist.com	drugs.com
nhs.uk	webmd.com	mayoclinic.org	migrainetrust.org
prevention.com	rxlist.com	webmd.com	patient.co.uk
health.com	americanheadachesociety.org	health.com	emedicinehealth.com
health.com	en.wikipedia.org	everydayhealth.com	mayoclinic.org
rd.com	migrainetrust.org	emedicinehealth.com	medicinenet.com
wikihow.com	migrainetrust.org	patient.co.uk	nhs.uk
caring.com	achenet.org	achenet.org	nhs.uk
